# Supplementary material for: Unpacking the Taxonomy of Wildland Fire Collaboratives in the United States West: Impact of Response Diversity on Social-Ecological Resilience
Source: Springer Nature journal article supplement (doi:10.1007/s00267-025-02170-w), 2025-04-21
Supplement: MOESM1 [file 267_2025_2170_MOESM1_ESM.pdf]

## Supplementary Information

**Table S1:** Mission orientation definitions in detail.

| Family                | Category             | Definition                                                                                                                                                                                                                                                                                                                                   | Clear Examples                                                                                                                                                                                                                                                                                                                                                                                                                                                                                                                                                                                       | Ambiguous Examples                                                                                                                                                                                                                                                                                                                                                                                                                                                                                                                                                                                                                                                                                                                                                               |
|-----------------------|----------------------|----------------------------------------------------------------------------------------------------------------------------------------------------------------------------------------------------------------------------------------------------------------------------------------------------------------------------------------------|------------------------------------------------------------------------------------------------------------------------------------------------------------------------------------------------------------------------------------------------------------------------------------------------------------------------------------------------------------------------------------------------------------------------------------------------------------------------------------------------------------------------------------------------------------------------------------------------------|----------------------------------------------------------------------------------------------------------------------------------------------------------------------------------------------------------------------------------------------------------------------------------------------------------------------------------------------------------------------------------------------------------------------------------------------------------------------------------------------------------------------------------------------------------------------------------------------------------------------------------------------------------------------------------------------------------------------------------------------------------------------------------|
| Land use orientations | Rangeland management | Refers to balancing land use between social uses of rangelands such as cattle ranching and grazing and rangeland ecosystem protection such as protection of critically endangered sage grouse and its habitat and other habitat protection initiatives. It also includes noxious weed management and removal and native vegetation planting. | Altar Valley Conservation Alliance (AZ) and its partners have indeed found common ground to restore grassland watersheds and return life to fire-adapted landscapes in order to increase native grasses, decrease brush encroachment, and make working landscapes and sustainable ranching an integral part of large-landscape conservation.<br><br>Northeastern Nevada Stewardship Group is a collaborative group based in Elko, Nevada. We address natural resource issues such as range management, stewardship of the sagebrush ecosystem, recreational opportunities, and sage-grouse recovery. | Klamath Lake Forest Health Partnership (OR) developed a strategic, accelerated restoration and priority landscape framework for Klamath and Lake Counties. This framework consolidates existing efforts within all land ownerships; identifies priority landscapes; coordinates communications; facilitates outreach; continues to promote public and landowner education; support the use of best science; and identify potential funding sources.<br><br>The Chumstick Wildfire Stewardship Coalition's (WA) highest goal is to change the social, environmental, and economic contexts in which we view fire by creating fire adapted landscapes, governments, businesses, and residents, all connected and collaborating to change the way we live and work in fire country. |
|                       | Forest economies     | Refers to management of forests for timber use, developing local economies around wood production, community management of forests for timber and balancing wood products                                                                                                                                                                    | Panhandle Forest Collaborative (ID) mission is reducing litigation, promoting sustainable operations, enhancing travel and recreation opportunities, maintaining infrastructure for timber, ranching and recreation, and conserving native ecosystems.                                                                                                                                                                                                                                                                                                                                               | Big Thomson Coalition (CO) mission is to foster resilience in the watershed by providing multi-purpose and multi-stakeholder benefits to water and forest resources, as well as the wildlife and people who depend on them. Raised >\$10 million since 2013 from federal, state and local funds for river                                                                                                                                                                                                                                                                                                                                                                                                                                                                        |

|  |           |                                                                                                                                                                                                                                                                          |                                                                                                                                                                                                                                                                                                                                                                                                                                                                                                                       |                                                                                                                                                                                                                                                                                                                                                                                                                                                                                                                                                                                                                                                                                             |
|--|-----------|--------------------------------------------------------------------------------------------------------------------------------------------------------------------------------------------------------------------------------------------------------------------------|-----------------------------------------------------------------------------------------------------------------------------------------------------------------------------------------------------------------------------------------------------------------------------------------------------------------------------------------------------------------------------------------------------------------------------------------------------------------------------------------------------------------------|---------------------------------------------------------------------------------------------------------------------------------------------------------------------------------------------------------------------------------------------------------------------------------------------------------------------------------------------------------------------------------------------------------------------------------------------------------------------------------------------------------------------------------------------------------------------------------------------------------------------------------------------------------------------------------------------|
|  |           | industry with forest health and biodiversity protection.                                                                                                                                                                                                                 | Darrington Collaborative (WA) mission is to simultaneously create a more ecologically resilient forest, provide for increased, sustainable timber harvests on the Mount Baker-Snoqualmie National Forest near Darrington, and provide economic benefits to the community of Darrington and educational opportunities for Darrington's youth through the STEM program.                                                                                                                                                 | <p>improvement projects, developed 3 large-scale river management and restoration plans, completed 10 major river enhancement projects and worked with &gt;150 private landowners and organizations.</p> <p>The California Wildfire &amp; Forest Resilience Taskforce is a collaborative effort to align the activities of federal, state, local, public, private and tribal organizations to support programs and projects tailored to the priorities and risks of each region, and bring the best available science to forest management and community protection efforts.</p>                                                                                                            |
|  | Wildlands | Refers to management of forest and/or watershed ecosystems for a variety of purposes including recreational use, local and traditional use of natural resources, balancing a multitude of different stakeholder groups social values around land use and rural identity. | <p>North Coast Resource Partnership (CA) enhances the watersheds and communities of the North Coast region through integrated, multi-objective planning and project implementation in collaboration with North Coast partners.</p> <p>The Cimarron River and Valley Watershed Coalition (NM) is a community-based organization focused on helping make the watershed a vibrant watershed flowing high quality and abundant water, healthy forests, productive agriculture, and great recreation for all to enjoy.</p> | <p>Northwest Community Forest Coalition (PNW) builds a broad base of support for increasing the scale and extent of community-owned forests in Washington and Oregon. Build capacity of community-based organizations to meet land acquisition needs and ensure the long-term viability of local ownership and management of community-owned forests.</p> <p>High Desert Partnership (OR) brings people together to solve local problems, cooperatively. We do this by creating opportunities to listen, be heard, foster understanding, build trust, and forge unexpected relationships. By working together, we ensure our local economy, natural environment, and uniquely rural way</p> |

|                                 |                              |                                                                                                                                                                                                                                                                                                                                                                                                                                                |                                                                                                                                                                                                                                                                                                                                                                                                                                                                                                                                                                                                                                                                                                                                                                |                                                                                                                                                                                                                                                                                                                                                                                                                                                                                                                                                                                                                                                                                                                                                             |
|---------------------------------|------------------------------|------------------------------------------------------------------------------------------------------------------------------------------------------------------------------------------------------------------------------------------------------------------------------------------------------------------------------------------------------------------------------------------------------------------------------------------------|----------------------------------------------------------------------------------------------------------------------------------------------------------------------------------------------------------------------------------------------------------------------------------------------------------------------------------------------------------------------------------------------------------------------------------------------------------------------------------------------------------------------------------------------------------------------------------------------------------------------------------------------------------------------------------------------------------------------------------------------------------------|-------------------------------------------------------------------------------------------------------------------------------------------------------------------------------------------------------------------------------------------------------------------------------------------------------------------------------------------------------------------------------------------------------------------------------------------------------------------------------------------------------------------------------------------------------------------------------------------------------------------------------------------------------------------------------------------------------------------------------------------------------------|
|                                 |                              |                                                                                                                                                                                                                                                                                                                                                                                                                                                |                                                                                                                                                                                                                                                                                                                                                                                                                                                                                                                                                                                                                                                                                                                                                                | of life meet the needs of today, while creating a roadmap for future generations to follow.                                                                                                                                                                                                                                                                                                                                                                                                                                                                                                                                                                                                                                                                 |
|                                 | Settlements                  | Refers to specific actions and policies around protection of public and private infrastructure and assets from fire risk. It includes protection of water treatment infrastructure for instance from wildfire risk but also predominantly protection of houses and properties from fire risk by promoting defensible space, home hardening, fuels reduction, and community engagement in fire preparedness in partnership with local agencies. | <p>The Greater Flagstaff Forests Partnership (AZ) is a viable, respected, community-based organization that supports collaborative efforts and has been a leader in researching and demonstrating approaches to forest ecosystem restoration in the ponderosa pine forests surrounding Flagstaff, Arizona since 1996.</p> <p>The mission of the Estancia Basin Watershed Health Restoration and Monitoring (NM) Project is to improve watershed health and conservation, increase water recharge, reduce property and natural resource loss from fire, and ensure consistent implementation of restoration projects through the collaborative efforts of member Soil and Water Conservation Districts (SWCD) and other stakeholders in the Estancia Basin.</p> | <p>The Upper South Platte Partnership (CO) is a partnership of government agencies, water providers, nonprofit organizations, and academic institutions with a common vision of sustainable and resilient landscapes, healthy forests, proactive and engaged fire-adapted communities, with safe, effective, and efficient fire response and management in the Upper South Platte watershed.</p> <p>The Rivers to Ridges Partnership (OR) is dedicated to improving the quality of life for residents in the upper Willamette Valley by working together to protect and enhance the region's land and water resources and their ecosystem functions and values; and to provide environmental education and compatible outdoor recreation opportunities.</p> |
| <b>Stewardship orientations</b> | Forest resilience and health | Refers to actions taken to promote, advance, restore, conserve forest health including forest management practices for improved ecosystem functioning, and sustainable community management for economic development.                                                                                                                                                                                                                          | The Payette Forest Coalition (ID) represents a range of interests in the Payette National Forest. Its mission is to build diverse community support for forest restoration. Landscape scale restoration can transition the forest towards improved conditions and address five goals of the Coalition's diverse interests: Wildlife, Wildfire, Watershed Health, Access and Recreation, and Restoration Economics                                                                                                                                                                                                                                                                                                                                              | The Alpine Biomass Collaborative (CA) is a new collaborative group in Alpine County that believes that by improving forest and watershed health the risk of catastrophic wildfire can be reduced, and by using local labor to do this the local economy will benefit.                                                                                                                                                                                                                                                                                                                                                                                                                                                                                       |

|  |                                 |                                                                                                                                                                                                                                                                                                                                                                        |                                                                                                                                                                                                                                                                                                                                   |                                                                                                                                                                                                                                                                                                                                                                                                                                                                                                                             |
|--|---------------------------------|------------------------------------------------------------------------------------------------------------------------------------------------------------------------------------------------------------------------------------------------------------------------------------------------------------------------------------------------------------------------|-----------------------------------------------------------------------------------------------------------------------------------------------------------------------------------------------------------------------------------------------------------------------------------------------------------------------------------|-----------------------------------------------------------------------------------------------------------------------------------------------------------------------------------------------------------------------------------------------------------------------------------------------------------------------------------------------------------------------------------------------------------------------------------------------------------------------------------------------------------------------------|
|  | Watershed resilience and health | Refers to actions taken to improve, restore, protect watershed health including soil conservation and headwater forest restoration, channel protection, streambank stabilization, instream wood placement, flow improvements, riparian restoration and protection from cattle grazing, aquatic fish stocking and conservation, water temperature regulation and so on. | South Fork American River Cohesive Strategy (CA) on a watershed scale, will work to create a fire-resilient ecosystem that supports viable populations of all native species, sustainable fisheries, functioning and restored watersheds and water quality, protected cultural resources, and diverse recreational opportunities. | The Greater Rio Grande Watershed Alliance (NM). GRGWA is a collaboration of soil and water conservation districts (SWCDs), Pueblos, agencies, and stakeholders along the Middle Rio Grande Watershed working on landscape-scale watershed restoration, with a focus on non-native phreatophyte removal from the bosque.                                                                                                                                                                                                     |
|  | Source water protection         | Refers to specific activities including reforestation to improve soil health and reduce erosion, headwater forest conservation and reservoir management to improve and protect water quality for downstream drinking water consumption.                                                                                                                                | Watershed Wildfire Protection Group (CO) protects Colorado water supplies and critical infrastructure from catastrophic wildfire and other threats by maintaining healthy, resilient watersheds through collaboration, implementation, leveraging, and education.                                                                 | The mission of the Cimarron Valley and River Watershed Coalition (NM) is to provide education, financial resources, communication and project implementation for improving and protecting water quality, water conservation, water use, instream flows and fisheries in the Cimarron River and its tributaries while also ensuring the long-term sustainability of the watershed's important agricultural community. The CVRWC shall operate in a collaborative manner with landowners, agencies and members of the public. |
|  | Biodiversity and habitat        | Refers to specific forest restoration practices that improve stand diversity for fire resilience, reduce the risk of high intensity fires, planting native vegetation, managing and reducing invasive vegetation, conserving habitat                                                                                                                                   | The Nevada Sagebrush Ecosystem Program is a collaborative, multi-disciplinary program made up of the governor-appointed Sagebrush Council and the Sagebrush Ecosystem Technical Team, established to protect and enhance the sagebrush landscape.                                                                                 | The vision of the Northern Blues Forest Collaborative (PNW) is to create a vibrant Northern Blues with a restored and resilient forested landscape, strong job, recreation and business opportunities, and social harmony across the region.                                                                                                                                                                                                                                                                                |

|                           |                         |                                                                                                                                                                                                          |                                                                                                                                                                                                                                                                                                                                                                                                                                                                        |                                                                                                                                                                                                                                                                                                                            |
|---------------------------|-------------------------|----------------------------------------------------------------------------------------------------------------------------------------------------------------------------------------------------------|------------------------------------------------------------------------------------------------------------------------------------------------------------------------------------------------------------------------------------------------------------------------------------------------------------------------------------------------------------------------------------------------------------------------------------------------------------------------|----------------------------------------------------------------------------------------------------------------------------------------------------------------------------------------------------------------------------------------------------------------------------------------------------------------------------|
|                           |                         | for threatened and endangered species and recreational uses.                                                                                                                                             |                                                                                                                                                                                                                                                                                                                                                                                                                                                                        |                                                                                                                                                                                                                                                                                                                            |
| <b>Ecological actions</b> | Preservation/protection | Refers to preserving and protecting landscapes, watersheds, forests from use, and values-at-risk, properties, and infrastructure from risk.                                                              | <p>The primary purpose of the Calaveras Foothills Fire Safe Council (CA) is to help protect our citizens, their property, and our natural resources from the effects of catastrophic wildland fire within Calaveras and adjacent counties.</p> <p>The Clearwater Basin Collaborative (ID) enhances and protects the ecological and economic health of the forests, rivers, and communities within the Clearwater Basin by working across a diversity of interests.</p> | The Whitefish Range Partnership (MT) mission is identifying the shared traditional livelihood and lifestyle values associated with the Whitefish Range, and working together to safeguard those values, to ensure that the exceptional natural and cultural heritage of this range may be passed on to future generations. |
|                           | Conservation            | Entails conserving ecosystems and their functioning and processes.                                                                                                                                       | <p>Over the past decade, the Northern Sierra Partnership (CA) has become the booster rocket for conservation in the northern Sierra. Working together, the NSP partners have mobilized the human and financial resources to conserve over 107,000 acres across the region.</p> <p>Swan Valley Connections (MT) mission is to inspire conservation and expand stewardship in the Swan Valley.</p>                                                                       | The 4Rivers Resilient Forest Collaborative (CO) mission is to envision a future where communities lead stewardship actions that promote resilient watersheds and forests on all lands within their scope, strengthening the ecological, economic, and sociocultural character of the region.                               |
|                           | Restoration             | Entails attempts to return ecosystems and their functions, processes and biodiversity to prior or historic conditions, improving/enhancing current forest/watershed health from degraded and/or overused | The Northern Arizona Forest Fund (AZ) is a partnership between the National Forest Foundation and SRP that takes an active role in restoring forested lands and waterways on the Salt and Verde rivers watersheds. NAFF projects focus on four key areas: forest thinning and burning, stream and wetland restoration, sediment and                                                                                                                                    | The 5B Restoration Coalition (ID) is working to apply the region's best thinking across sectors, developing creative and effective solutions that will generate both community and ecological resilience for future natural events.                                                                                        |

|                       |                            |                                                                                                                                                                                                                                                                                                                                                                                                                                                   |                                                                                                                                                                                                                                                                                                                                                                                                                                                          |                                                                                                                                                                                                             |
|-----------------------|----------------------------|---------------------------------------------------------------------------------------------------------------------------------------------------------------------------------------------------------------------------------------------------------------------------------------------------------------------------------------------------------------------------------------------------------------------------------------------------|----------------------------------------------------------------------------------------------------------------------------------------------------------------------------------------------------------------------------------------------------------------------------------------------------------------------------------------------------------------------------------------------------------------------------------------------------------|-------------------------------------------------------------------------------------------------------------------------------------------------------------------------------------------------------------|
|                       |                            | landscapes towards healthy ecosystem functioning.                                                                                                                                                                                                                                                                                                                                                                                                 | <p>erosion management and revegetation projects.</p> <p>The Indigenous Peoples Burning Network (IMW+) is a support network among Native American communities that are revitalizing their traditional fire practices in a contemporary context.</p>                                                                                                                                                                                                       |                                                                                                                                                                                                             |
| <b>Social actions</b> | Action-oriented engagement | Refers to proactive fostering of collaboration among stakeholders and engaging in activities to advance economic, social and ecological health, promoting science-based solutions and best practices and providing material and/or non-material support for addressing fire risk for ecological and community health. More applicable to on-ground activities and facilitation of collaboratives around those activities and education/awareness. | Started in 2018, the North Yuba Forest Partnership (CA) focuses on prioritizing, planning and executing landscape-scale forest health projects on nearly 275,000 acres of Sierra Nevada forests. Made up of diverse perspectives and interests, this collaborative will address forest health for biodiversity, habitat, clean and abundant water, carbon storage, fire protection, and recreational opportunities.                                      | The Boulder Watershed Collective (CO) mission is to cultivate partnerships, promote community stewardships and revitalize social and ecological systems within the BWC and beyond.                          |
|                       | Policy-oriented engagement | Refers to the stewardship that is geared toward service provision including partnership facilitation, job creation for local economic growth, fostering social connections, undertaking legal challenges to practices that do not promote social-ecological health and resilience, provide policy recommendations to agency partners for ecosystem management. More                                                                               | The Beaverhead Deerlodge Working Group (MT) works to develop common understanding among diverse stakeholders and serves as a bridge to broader constituencies on the Beaverhead-Deerlodge National Forest (BDNF). Working Group members hope to provide a way to resolve forest-level issues in a positive manner before they get to the appeal stage, resulting in more restoration work being done on the ground and in a way that achieves ecological | Southwest Fire and Climate Adaptation Partnership (IMW) is an open and inclusive group of partners with a shared vision for working together to advance fire and climate adaptation in the southwestern US. |

|                                     |                           |                                                                                                                                                                                                                                                                                                                          |                                                                                                                                                                                                                                                                                                                                                                                                                                                                                                                                                                                      |                                                                                                                                                                                                                                                                                                                                                                                        |
|-------------------------------------|---------------------------|--------------------------------------------------------------------------------------------------------------------------------------------------------------------------------------------------------------------------------------------------------------------------------------------------------------------------|--------------------------------------------------------------------------------------------------------------------------------------------------------------------------------------------------------------------------------------------------------------------------------------------------------------------------------------------------------------------------------------------------------------------------------------------------------------------------------------------------------------------------------------------------------------------------------------|----------------------------------------------------------------------------------------------------------------------------------------------------------------------------------------------------------------------------------------------------------------------------------------------------------------------------------------------------------------------------------------|
|                                     |                           | applicable to facilitation of collaboration around legal and policy avenues of response.                                                                                                                                                                                                                                 | objectives as well as community benefits.                                                                                                                                                                                                                                                                                                                                                                                                                                                                                                                                            |                                                                                                                                                                                                                                                                                                                                                                                        |
| <b>Fire management philosophies</b> | Fuels removal             | Refers to actions taken to reduce fuels around communities as well as in natural and working landscapes, including logging to reduce stand density, removal of deadwood, surface and ladder fuels removal, tree thinning, invasive vegetation/weed removal, buffer space creation around infrastructure/roads and so on. | FireSafe Montana educates on the need for and how to do wildland fuel hazard identification and mitigation and the creation of survivable space.                                                                                                                                                                                                                                                                                                                                                                                                                                     | The Fire Safe Council of San Diego County (CA) brings together community FSCs, along with local, state, and federal fire agencies in addition to other stakeholders. By working together across the county, we can utilize our combined experience, expertise, and common objectives to ensure our homes, businesses, and communities are well protected from the threats of wildfire. |
|                                     | Fire resilient ecosystems | Refers to actions undertaken to improve or enhance resilience and health of forests/watersheds including managing fire regimes for healthy forest/watershed habitats and biodiversity conservation.                                                                                                                      | The Greater Santa Fe Fireshed Coalition (NM) uses a pro-active, collaborative approach to improve the health and long-term resilience of forested watersheds and communities by addressing wildfire. Their primary goal is to identify and implement high priority on-the ground projects that make the Fireshed and its communities more resilient to wildfire while maintaining and restoring resilient landscapes. This goal will be realized when fire is used as a tool for management throughout their fire adapted forests, and communities in and adjacent to these forests. | Sierra Forest Legacy's (CA) mission is to engage land managers, scientists, and stakeholders in the management of Sierra Nevada ecosystems to protect and restore the unparalleled beauty and natural values of the region.                                                                                                                                                            |
|                                     | Fire adapted communities  | Refers to advocating for the adaptation of communities to live with fire risks. Specific actions include emergency and disaster preparedness, CWPPs, ensuring safety of                                                                                                                                                  | The Watershed Research and Training Center (CA) is a non-profit organization located in the heart of Trinity County, California. We conduct the full gamut of land and watershed management services, lead state                                                                                                                                                                                                                                                                                                                                                                     | The mission of the Central Texas Prescribed Fire Council is to foster cooperation among all parties with an interest or stake in prescribed fire for the purpose of promoting, conserving,                                                                                                                                                                                             |

|                                          |                      |                                                                                                                                                                                                                                                                                                                                                                                                                                                                                                     |                                                                                                                                                                                                                                                                                         |                                                                                                                                                                                                                                                                                         |
|------------------------------------------|----------------------|-----------------------------------------------------------------------------------------------------------------------------------------------------------------------------------------------------------------------------------------------------------------------------------------------------------------------------------------------------------------------------------------------------------------------------------------------------------------------------------------------------|-----------------------------------------------------------------------------------------------------------------------------------------------------------------------------------------------------------------------------------------------------------------------------------------|-----------------------------------------------------------------------------------------------------------------------------------------------------------------------------------------------------------------------------------------------------------------------------------------|
|                                          |                      | evacuation routes, providing resources to property owners and community in mitigating fire risks on their properties and encouraging individual responsibility increasing firefighting capacity in the community, providing resources for conducting prescribed burns and smoke management in the community and so on. It is similar to asset protection, creation of defensible space, reducing fuels risk around homes/properties, also includes mentions or actions indicating fire suppression. | biomass and fire resilience partnerships, and through partnerships with communities, organizations, and public agencies we steward our landscape, create and sustain quality jobs, and connect people to the land and each other.                                                       | and expanding the responsible use of fire as a land management tool.                                                                                                                                                                                                                    |
|                                          | Prescribed burning   | Refers to proactive encouragement of the use of prescribed and/or pile/brush burning in properties, communities and publicly owned forests/watersheds.                                                                                                                                                                                                                                                                                                                                              | Northern Colorado Fireshed Collaborative mission is to create resilient landscapes by facilitating an increase in the pace and scale of not only mechanical fuel reduction methods but also prescribed fires and strategically managed wildland fires across jurisdictional boundaries. | California Prescribed Burn Associations are community based, mutual aid networks that help private landowners put “good fire” back on the land. The Cal PBA website is a one-stop location for PBAs in California - providing contact information and useful prescribed fire resources. |
| <b>Community well-being orientations</b> | Recreation and place | Refers to well-being and values associated with recreational uses of public lands whether federal, state, local or community-owned. Can include uses of lands for hunting/fishing, tourism and biodiversity. Includes social capital built around community identification with region/place.                                                                                                                                                                                                       | The Yuba Forest Network (CA) is envisioned as a central networking hub that promotes a united regional identity around the forests of the Yuba watershed and uplifts and connects the voices of active stewards of the landscape.                                                       | The Montana Forest Collaboration Network assists collaboration in forest and grassland restoration, conservation, and resource utilization for the benefit of all.                                                                                                                      |



|  |                            |                                                                                                                                                                                                                                                                                                                                                                                                                          |                                                                                                                                                                                                                                                               |                                                                                                                                                                                          |
|--|----------------------------|--------------------------------------------------------------------------------------------------------------------------------------------------------------------------------------------------------------------------------------------------------------------------------------------------------------------------------------------------------------------------------------------------------------------------|---------------------------------------------------------------------------------------------------------------------------------------------------------------------------------------------------------------------------------------------------------------|------------------------------------------------------------------------------------------------------------------------------------------------------------------------------------------|
|  | Economic well-being        | Refers to activities that promote local/regional economies including extractive activities such as mining, timber and wood products industries, cattle ranching and allied industrial and economic development activities that provide jobs/livelihoods to locals. Also refers to preserving rural values and ways of life and rural cultures around land use and local/regional identity in management of public lands. | Envision Chaffee County (CO) mission is Envisioning a thriving economy for Chaffee County and have a long-term view for growth.                                                                                                                               | Blue Forest Conservation (OR) is a mission-driven, non-profit organization, leveraging financial innovation to create sustainable investment solutions to environmental challenges.      |
|  | Physical health and safety | Refers to well-being around safety of community in the event of fire occurrence such as disaster preparedness, mitigation readiness and health protection from smoke and pollution from fire or water quality impacts.                                                                                                                                                                                                   | The West Region Wildfire Council (CO) promotes wildfire preparedness, prevention and mitigation education. WRWC brings together wildland urban interface residents, fire districts, agency representatives and other partners to better prepare for wildfire. | The Amador-Calaveras Consensus Group (CA) is a community-based organization that works to create fire-safe communities, healthy forests and watersheds, and sustainable local economies. |



**Table S2:** Alphabetically state-ordered list of collaboratives as key for Figure 3.

| Number | State      | Collaborative Acronym | Collaborative                                                 |
|--------|------------|-----------------------|---------------------------------------------------------------|
| 1      | Arizona    | AVCA                  | Altar Valley Conservation Alliance                            |
| 2      |            | GFFP                  | Greater Flagstaff Forests Partnership                         |
| 3      |            | NAFF                  | Northern Arizona Forest Fund                                  |
| 4      | California | ABC                   | Alpine Biomass Collaborative                                  |
| 5      |            | ACCG                  | Amador-Calaveras Consensus Group                              |
| 6      |            | BCWC                  | Battle Creek Watershed Conservancy                            |
| 7      |            | CFFSC                 | Calaveras Foothills Fire Safe Council                         |
| 8      |            | CFSC                  | California Fire Safe Councils                                 |
| 9      |            | CPBA                  | California Prescribed Burn Associations                       |
| 10     |            | CWFRTF                | California Wildfire & Forest Resilience Task Force            |
| 11     |            | ESCCRP                | Eastern Sierra Climate & Communities Resilience Project       |
| 12     |            | FRSC                  | Feather River Stewardship Coalition                           |
| 13     |            | Fire Forward          | Fire Forward                                                  |
| 14     |            | FSCSDC                | Fire Safe Council of San Diego County                         |
| 15     |            | FSSC                  | Fire Safe Sierra County                                       |
| 16     |            | IRC                   | Irvine Ranch Conservancy                                      |
| 17     |            | LTWRP                 | Lake Tahoe West Restoration Partnership                       |
| 18     |            | MKWC                  | Mid-Klamath Watershed Council                                 |
| 19     |            | NCFSC                 | Nevada County Fire Safe Council                               |
| 20     |            | NCRP                  | North Coast Resource Partnership                              |
| 21     |            | NSP                   | Northern Sierra Partnership                                   |
| 22     |            | NYFP                  | North Yuba Forest Partnership                                 |
| 23     |            | SRRC                  | Salmon River Restoration Council                              |
| 24     |            | SRWC                  | Scott River Watershed Council                                 |
| 25     |            | SFL                   | Sierra Forest Legacy                                          |
| 26     |            | SRA                   | Smith River Alliance                                          |
| 27     |            | SFARCS                | South Fork American River Cohesive Strategy                   |
| 28     |            | SLWG                  | South Lassen Watershed Group                                  |
| 29     |            | SSPFC                 | Southern Sierra Prescribed Fire Council                       |
| 30     |            | TCSI                  | Tahoe Central Sierra Initiative                               |
| 31     |            | TCF                   | The CalFauna Foundation                                       |
| 32     |            | TSF                   | The Sierra Fund                                               |
| 33     |            | Watershed Center      | The Watershed Research and Training Center (Watershed Center) |
| 34     |            | TC                    | Trinity Collaborative                                         |
| 35     |            | WKRP                  | Western Klamath Restoration Partnership                       |
| 36     |            | YSSFC                 | Yosemite Stanislaus Solutions Forest Collaborative            |

|    |          |                  |                                                  |
|----|----------|------------------|--------------------------------------------------|
| 37 |          | YFN              | Yuba Forest Network                              |
| 38 |          | YWPFSC           | Yuba Watershed Protection & Fire Safe Council    |
| 39 | Colorado | 4RRFC            | 4Rivers Resilient Forest Collaborative           |
| 40 |          | ARWC             | Arkansas River Watershed Collective              |
| 41 |          | BTC              | Big Thompson Coalition                           |
| 42 |          | BCF              | Boulder County Fireshed                          |
| 43 |          | BWC              | Boulder Watershed Collective                     |
| 44 |          | CCWFHP           | Clear Creek Watershed Forest Health Partnership  |
| 45 |          | CPRW             | Coalition for the Poudre River Watershed         |
| 46 |          | CUSP             | Coalition for the Upper South Platte             |
| 47 |          | DWRF             | Dolores Watershed Resilient Forest Collaborative |
| 48 |          | ECC              | Envision Chaffee County                          |
| 49 |          | EVWC             | Estes Valley Watershed Coalition                 |
| 50 |          | FRR              | Front Range Roundtable                           |
| 51 |          | HCFC             | High Country Forest Collaborative                |
| 52 |          | LHWC             | Left Hand Watershed Center                       |
| 53 |          | MWG              | Mancos Watershed Group (MWG)                     |
| 54 |          | NCFC             | Northern Colorado Fireshed Collaborative         |
| 55 |          | PPWF             | Peaks to People Water Fund                       |
| 56 |          | RGHRP            | Rio Grande Headwaters Restoration Project        |
| 57 |          | RMRI             | Rocky Mountain Restoration Initiative (RMRI)     |
| 58 |          | SFHFHP           | San Juan Headwaters Forest Health Partnership    |
| 59 |          | USPP             | Upper South Platte Partnership                   |
| 60 |          | WWPG             | Watershed Wildfire Protection Group              |
| 61 |          | WRWC             | Western Region Wildfire Council                  |
| 62 |          | WAP              | Wildfire Adapted Partnership                     |
| 63 | Idaho    | 5BRC             | 5B Restoration Coalition                         |
| 64 |          | BFC              | Boise Forest Coalition                           |
| 65 |          | CBC              | Clearwater Basin Collaborative                   |
| 66 |          | KVRI             | Kootenai Valley Resource Initiative              |
| 67 |          | LFRG             | Lemhi Forest Restoration Group                   |
| 68 |          | PFC I            | Panhandle Forest Collaborative                   |
| 69 |          | PFC II           | Payette Forest Coalition                         |
| 70 |          | SVWFC            | Sawtooth Valley Wildland Fire Collaborative      |
| 71 |          | SBFHC            | Shoshone Benewah Forest Health Collaborative     |
| 72 | Montana  | BDWG             | Beaverhead Deerlodge Working Group               |
| 73 |          | BC               | Blackfoot Challenge                              |
| 74 |          | CRC              | Clearwater Resource Collaborative                |
| 75 |          | CGWG             | Custer Gallatin Working Group                    |
| 76 |          | Firesafe Montana | FireSafe Montana                                 |

|     |            |        |                                                                     |
|-----|------------|--------|---------------------------------------------------------------------|
| 77  |            | KFSC   | Kootenai Forest Stakeholders Coalition                              |
| 78  |            | MFCN   | Montana Forest Collaboration Network                                |
| 79  |            | SCC    | Southwestern Crown Collaborative                                    |
| 80  |            | SVWC   | Stillwater Valley Watershed Council                                 |
| 81  |            | SVC    | Swan Valley Connections                                             |
| 82  |            | WRP    | Whitefish Range Partnership                                         |
| 83  |            | YVFC   | Yaak Valley Forest Council                                          |
| 84  | Nevada     | NNSG   | Northeastern Nevada Stewardship Group                               |
| 85  |            | ROGER  | Results Oriented Grazing for Ecological Resilience                  |
| 86  |            | SEP    | Sagebrush Ecosystem Program                                         |
| 87  | New Mexico | CWA    | Cimarron Watershed Alliance                                         |
| 88  |            | EJLF   | East Jemez Landscape Futures                                        |
| 89  |            | EBC    | Estancia Basin Watershed Health, Restoration & Monitoring Committee |
| 90  |            | GRGWA  | Greater Rio Grande Watershed Alliance                               |
| 91  |            | GRWUI  | Greater Ruidoso Wildland Urban Interface Working Group              |
| 92  |            | RGWF   | Rio Grande Water Fund                                               |
| 93  |            | SC     | Sandia Collaborative                                                |
| 94  |            | GSFFC  | The Greater Santa Fe Fireshed Coalition                             |
| 95  |            | ZMC    | Zuni Mountains Collaborative                                        |
| 96  | Oregon     | APWC   | Applegate Partnership & Watershed Council                           |
| 97  |            | BRC    | Baker Resources Coalition                                           |
| 98  |            | BFC    | Blue Forest Conservation                                            |
| 99  |            | BMFP   | Blue Mountains Forest Partners                                      |
| 100 |            | CPRCD  | Cascade Pacific Resource Conservation & Development                 |
| 101 |            | CSP    | Clackamas Stewardship Partners                                      |
| 102 |            | DCFP   | Deschutes Collaborative Forest Project                              |
| 103 |            | HDP    | High Desert Partnerships                                            |
| 104 |            | JDBP   | John Day Basin Partnership                                          |
| 105 |            | KLFHP  | Klamath Lake Forest Health Partnership                              |
| 106 |            | LSG    | Lakeview Stewardship Group                                          |
| 107 |            | LRP    | Lomakatsi Restoration Project                                       |
| 108 |            | OFRC   | Ochoco Forest Restoration Collaborative                             |
| 109 |            | R2R    | Rivers to Ridges Partnership                                        |
| 110 |            | RFP    | Rogue Forest Partners                                               |
| 111 |            | SBRC   | Southern Blues Restoration Coalition                                |
| 112 |            | SOFRFC | Southern Oregon Forest Restoration Collaborative                    |
| 113 |            | SWFC   | Southern Willamette Forest Collaborative                            |
| 114 |            | UFCG   | Umatilla Forest Collaborative Group                                 |
| 115 |            | WRCFC  | Wild Rivers Coast Forest Collaborative                              |

|     |               |                  |                                                      |
|-----|---------------|------------------|------------------------------------------------------|
| 116 | Texas         | CTPFC            | Central Texas Prescribed Fire Council                |
| 117 |               | PBAT             | Prescribed Burn Alliance of Texas                    |
| 118 | Washington    | CSWC             | Chumstick Wildfire Stewardship Coalition             |
| 119 |               | DC               | Darrington Collaborative                             |
| 120 |               | NCWFHC           | North Central Washington Forest Health Collaborative |
| 121 |               | NWFC             | Northeast Washington Forest Coalition                |
| 122 |               | OFC              | Olympic Forest Collaborative                         |
| 123 |               | Pinchot Partners | Pinchot Partners                                     |
| 124 |               | SGPC             | South Gifford Pinchot Collaborative                  |
| 125 |               | TSFC             | Tapash Sustainable Forest Collaborative              |
| 126 | Wyoming       | WPFC             | Wyoming Prescribed Fire Council                      |
| 127 | Pacific       | NBFC             | Northern Blues Forest Collaborative                  |
| 128 | Northwest     | NCFC             | Northwest Community Forest Coalition                 |
| 129 |               | Sustainable NW   | Sustainable Northwest                                |
| 130 | Intermountain | 2-3-2 CSP        | 2-3-2 Partnership                                    |
| 131 | West          | IPBN             | Indigenous Peoples Burning Network                   |
| 132 |               | SFCAP            | Southwest Fire and Climate Adaptation Partnership    |
| 133 |               | SFSC             | Southwest Fire Science Consortium                    |
